# Supplementary material for: Adjunctive Perampanel Oral Suspension in Pediatric Patients From ≥2 to <12 Years of Age With Epilepsy: Pharmacokinetics, Safety, Tolerability, and Efficacy
Source: PubMed Central journal article supplement — J Child Neurol. 2019 Feb 10;34(5):284–94. doi: 10.1177/0883073819827407 (PMC6444512; doi:10.1177/0883073819827407), 2019-02-10
Supplement: Supplementary_Table_S1.pdf [file Supplementary_Table_S1.pdf]

**Table S1.** List of participating IECs and IRBs

| <b>IEC/IRB name and address</b>                                                                                          | <b>Principal investigator(s)</b> | <b>Site number(s)</b> |
|--------------------------------------------------------------------------------------------------------------------------|----------------------------------|-----------------------|
| <b>Central</b>                                                                                                           |                                  |                       |
| Quorum Review IRB 1501,<br>Fourth Avenue, Suite 800,<br>Seattle, WA 98101                                                | Ronald Davis, MD                 | 1020                  |
|                                                                                                                          | Jose Ferreira, MD                | 1021                  |
|                                                                                                                          | Satyanarayana Gedela, MD         | 1019                  |
|                                                                                                                          | Mark Mintz, MD                   | 1023                  |
|                                                                                                                          | J. Ben Renfro, MD                | 1001                  |
|                                                                                                                          | Keith Ridel, MD                  | 1003                  |
|                                                                                                                          | William Rosenfeld, MD            | 1012                  |
|                                                                                                                          | Jerry Tomasovic, MD              | 1018                  |
| <b>Local</b>                                                                                                             |                                  |                       |
| Committee for the Protection<br>of Human Subjects,<br>3535 Market Street,<br>Philadelphia, PA 19104                      | Lawrence Brown, MD               | 1005                  |
| Western IRB,<br>1019 39 <sup>th</sup> Avenue SE,<br>Puyallup, WA 98374                                                   | Joan Conry, MD                   | 1022                  |
|                                                                                                                          | Michael Duchovny, MD             | 1017                  |
|                                                                                                                          | Kristen Partk, MD                | 1015                  |
|                                                                                                                          | Jean Teasley, MD                 | 1024                  |
| Akron Children's Hospital<br>IRB, One Perkins Square,<br>Akron, OH 44308                                                 | Thomas Enlow, MD                 | 1004                  |
| University of Missouri Health<br>Sciences IRB,<br>One Hospital Drive,<br>Columbia, MO 65201                              | Timothy Fete, Sr., MD            | 1009                  |
| Louisiana State University<br>Health Sciences Center –<br>Shreveport IRB<br>15010 Kings Highway,<br>Shreveport, LA 71130 | Arun Kalra, MD                   | 1010                  |
| University of Kentucky<br>IRB, 315 Kindead Hall,<br>Lexington, KY 40506                                                  | Gulam Khan, MD                   | 1026                  |
| Cincinnati Children's<br>Hospital, Medical Center<br>IRB, 3333 Burnet Avenue,<br>Cincinnati, OH 45229                    | Diego Morita, MD                 | 1016                  |
| Medical College of Georgia,<br>Human Assurance<br>Committee, 1120 15 <sup>th</sup> Street,<br>Augusta, GA 30912          | Yong Park, MD                    | 1025                  |
| Nemours Florida IRB,<br>807 Children's Way,<br>Jacksonville, FL 32207                                                    | Raj Sheth, MD                    | 1013                  |
| University of Utah IRB,<br>75 South 2000 East,<br>Salt Lake City, UT 84112                                               | Colin Van Orman, MD              | 1014                  |

|                                                                                                       |                    |      |
|-------------------------------------------------------------------------------------------------------|--------------------|------|
| State University of New York<br>Buffalo IRB,<br>219 Bryant Street,<br>Buffalo, NY 14223               | Arie Weinstock, MD | 1002 |
| The University of Tennessee<br>Health Science Center IRB,<br>910 Madison Avenue,<br>Memphis, TN 38163 | James Wheless      | 1006 |

IEC, independent ethics committee; IRB, institutional review board
