# Supplementary material for: Adjunctive Perampanel Oral Suspension in Pediatric Patients From ≥2 to <12 Years of Age With Epilepsy: Pharmacokinetics, Safety, Tolerability, and Efficacy
Source: PubMed Central journal article supplement — J Child Neurol. 2019 Feb 10;34(5):284–94. doi: 10.1177/0883073819827407 (PMC6444512; doi:10.1177/0883073819827407), 2019-02-10
Supplement: Supplementary_Table_S2.pdf [file Supplementary_Table_S2.pdf]

**Table S2.** Demographics and other covariates included in the population PK analysis of perampanel (N = 194).

|                                            | <b>Mean (SD)</b>                                                                                              | <b>Median</b> | <b>Range<br/>(min–max)</b> |
|--------------------------------------------|---------------------------------------------------------------------------------------------------------------|---------------|----------------------------|
| Age (years)                                | 13.0 (3.77)                                                                                                   | 14.0          | 2.00–17.0                  |
| Weight (kg)                                | 50.5 (19.0)                                                                                                   | 49.2          | 12.2–121                   |
| Alanine transaminase (IU/L)                | 18.1 (13.0)                                                                                                   | 15.0          | 5.00–128                   |
| Aspartate transaminase (IU/L)              | 22.8 (10.0)                                                                                                   | 21.0          | 11.0–98.0                  |
| Creatinine clearance (mL/min) <sup>a</sup> | 109 (30.6)                                                                                                    | 109           | 19.5–150                   |
| Age group                                  | $\geq 2$ to $< 7$ years, n = 20<br>$\geq 7$ to $< 12$ years, n = 22<br>$\geq 12$ to $< 18$ years, n = 152     |               |                            |
| Gender                                     | Females, n = 80; males, n = 114                                                                               |               |                            |
| Race                                       | Caucasian, n = 137<br>Non-Caucasian, n = 57 (Black/African-American, n = 9;<br>Asian, n = 38; Others, n = 10) |               |                            |
| Formulation                                | Tablet, n = 152; suspension, n = 42                                                                           |               |                            |

<sup>a</sup>Creatinine clearance capped at 150 mL/min as a reasonable upper limit; values  $> 150$  mL/min (n = 30) were substituted with 150 mL/min.

Max: maximum; Min: minimum; PK: pharmacokinetic; SD: standard deviation.
