# Supplementary material for: Adjunctive Perampanel Oral Suspension in Pediatric Patients From ≥2 to <12 Years of Age With Epilepsy: Pharmacokinetics, Safety, Tolerability, and Efficacy
Source: PubMed Central journal article supplement — J Child Neurol. 2019 Feb 10;34(5):284–94. doi: 10.1177/0883073819827407 (PMC6444512; doi:10.1177/0883073819827407), 2019-02-10
Supplement: Supplementary_Table_S3.pdf [file Supplementary_Table_S3.pdf]

**Table S3.** TEAEs leading to study drug discontinuation.

|                                      | <b>CORE STUDY</b>         |                          |                 |
|--------------------------------------|---------------------------|--------------------------|-----------------|
|                                      | <b>Cohort 1</b>           | <b>Cohort 2</b>          | <b>Total</b>    |
|                                      | <b>≥7 to &lt;12 years</b> | <b>≥2 to &lt;7 years</b> |                 |
|                                      | <b>(N = 28)</b>           | <b>(N = 22)</b>          | <b>(N = 50)</b> |
| <b>Any TEAE leading to study</b>     | <b>2 (7.1)</b>            | <b>1 (4.5)</b>           | <b>3 (6.0)</b>  |
| <b>drug discontinuation, n (%)</b>   |                           |                          |                 |
| Gait disturbance                     | 1 (3.6)                   | 0 (0.0)                  | 1 (2.0)         |
| Irritability                         | 1 (3.6)                   | 0 (0.0)                  | 1 (2.0)         |
| Grand mal convulsion                 | 0 (0.0)                   | 1 (4.5)                  | 1 (2.0)         |
| Psychomotor hyperactivity            | 1 (3.6)                   | 0 (0.0)                  | 1 (2.0)         |
| Tremor                               | 1 (3.6)                   | 0 (0.0)                  | 1 (2.0)         |
| Abnormal behavior                    | 1 (3.6)                   | 0 (0.0)                  | 1 (2.0)         |
| Emotional distress                   | 1 (3.6)                   | 0 (0.0)                  | 1 (2.0)         |
|                                      | <b>EXTENSION</b>          |                          |                 |
|                                      | <b>Cohort 1</b>           | <b>Cohort 2</b>          | <b>Total</b>    |
|                                      | <b>≥7 to &lt;12 years</b> | <b>≥2 to &lt;7 years</b> |                 |
|                                      | <b>(N = 22)</b>           | <b>(N = 19)</b>          | <b>(N = 41)</b> |
| <b>Any TEAE leading to study</b>     | <b>2 (9.1)</b>            | <b>3 (15.8)</b>          | <b>5 (12.2)</b> |
| <b>drug discontinuation, n (%)</b>   |                           |                          |                 |
| Aggression                           | 1 (4.5)                   | 1 (5.3)                  | 2 (4.9)         |
| Gingival recession                   | 0 (0.0)                   | 1 (5.3)                  | 1 (2.4)         |
| Oral mucosal discoloration           | 0 (0.0)                   | 1 (5.3)                  | 1 (2.4)         |
| Blood alkaline phosphatase increased | 1 (4.5)                   | 0 (0.0)                  | 1 (2.4)         |

---

|                            |         |         |         |
|----------------------------|---------|---------|---------|
| Total bile acids increased | 1 (4.5) | 0 (0.0) | 1 (2.4) |
| Urine bilirubin increased  | 1 (4.5) | 0 (0.0) | 1 (2.4) |
| Lethargy                   | 0 (0.0) | 1 (5.3) | 1 (2.4) |
| Suicidal ideation          | 1 (4.5) | 0 (0.0) | 1 (2.4) |

---

For each row category, a patient with two or more TEAEs in that category is counted only once.

MedDRA: Medical Dictionary for Regulatory Activities; TEAE: treatment-emergent adverse event.
