# Supplementary figures and images for: Adjunctive Perampanel Oral Suspension in Pediatric Patients From ≥2 to <12 Years of Age With Epilepsy: Pharmacokinetics, Safety, Tolerability, and Efficacy
Source: PubMed Central journal article supplement — J Child Neurol. 2019 Feb 10;34(5):284–94. doi: 10.1177/0883073819827407 (PMC6444512; doi:10.1177/0883073819827407), 2019-02-10

■  $\geq 7$  to  $< 12$  years (Cohort 1; N=28) ■  $\geq 2$  to  $< 7$  years (Cohort 2; N=22) ■ Total (N=50)

**A**

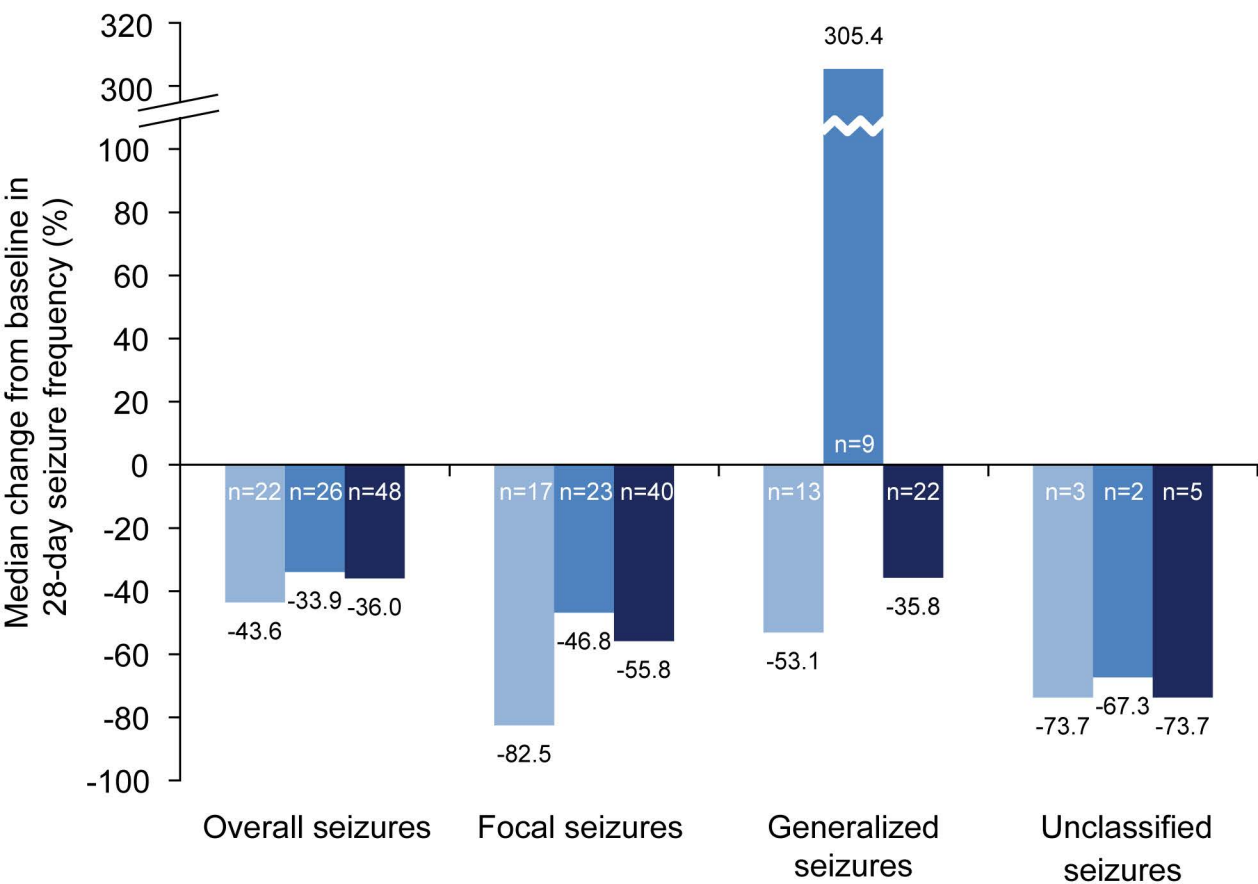

**B**

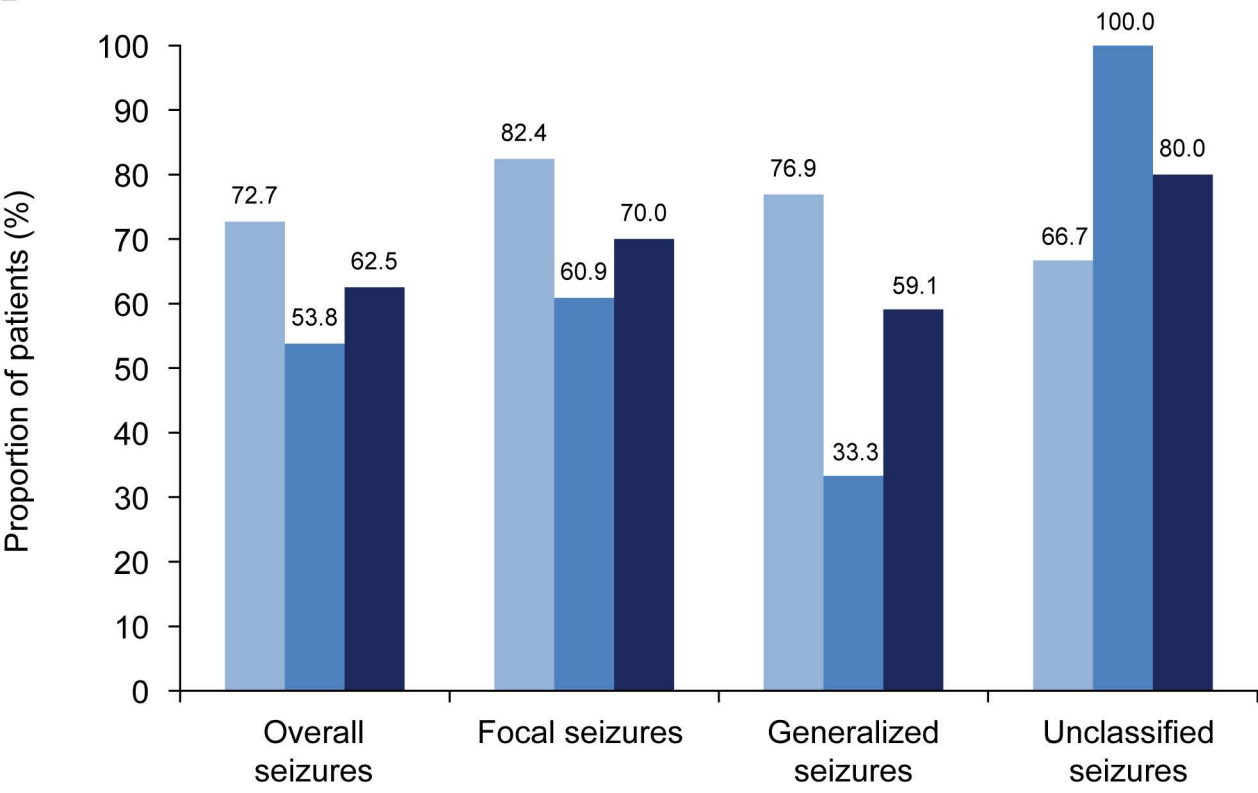

Supplement: Supplementary_Figure_S1.pdf [file Supplementary_Figure_S1.pdf]

■  $\geq 7$  to  $< 12$  years (Cohort 1)    
 ■  $\geq 2$  to  $< 7$  years (Cohort 2)    
 ■ Total

**A**

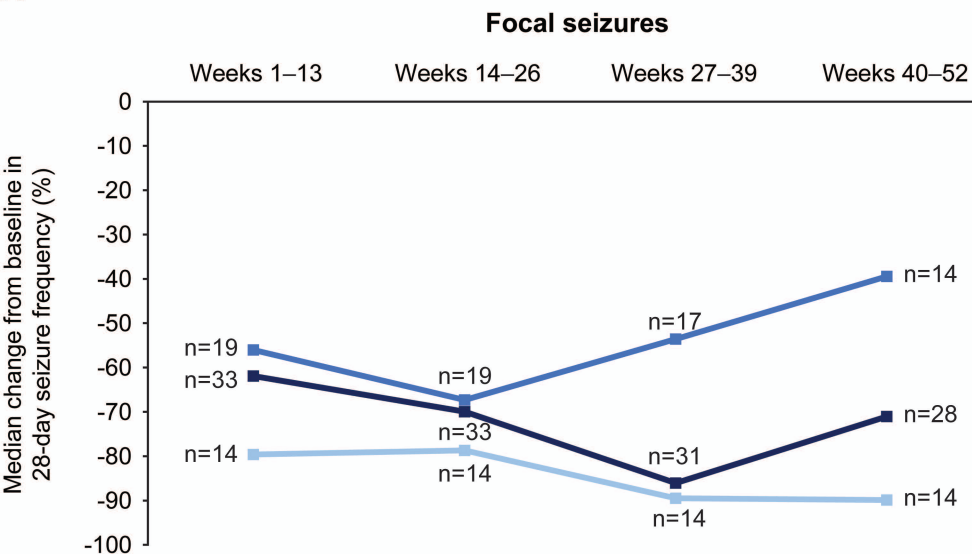

**B**

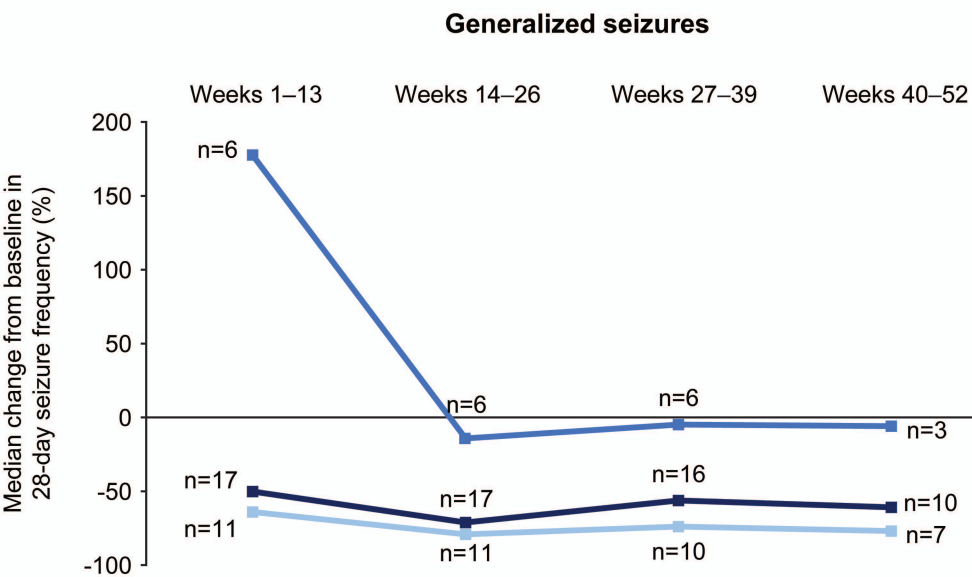

Supplement: Supplementary_Figure_S2.pdf [file Supplementary_Figure_S2.pdf]

■  $\geq 7$  to  $< 12$  years (Cohort 1) ■  $\geq 2$  to  $< 7$  years (Cohort 2) ■ Total

**A**

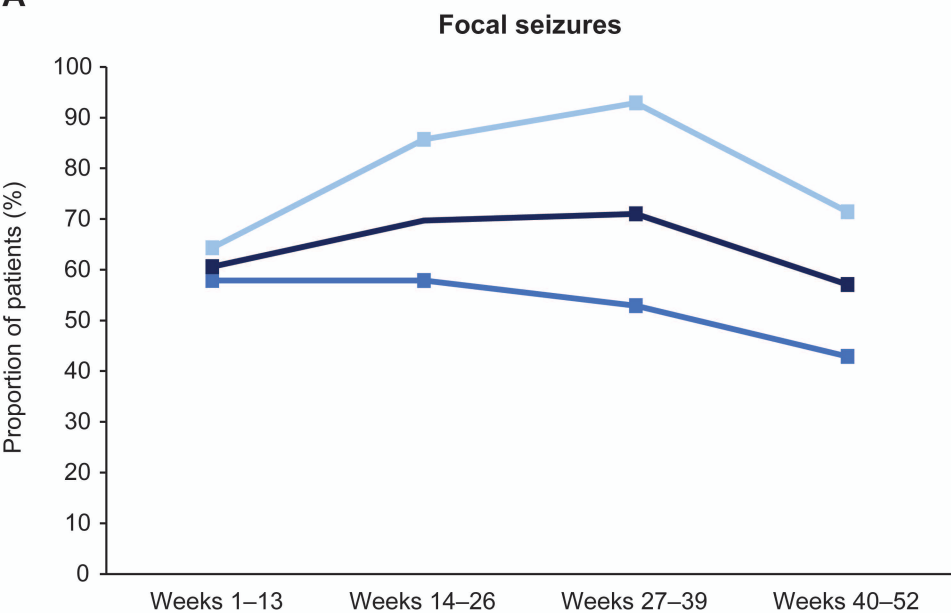

**B**

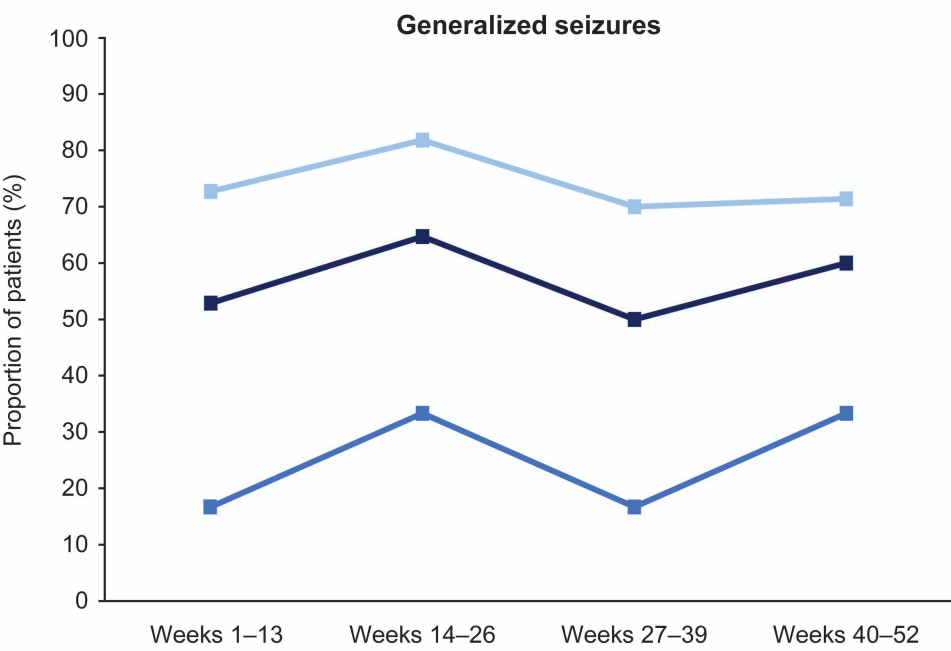

Supplement: Supplementary_Figure_S3.pdf [file Supplementary_Figure_S3.pdf]
